# Supplementary material for: The long noncoding RNA ADIPINT regulates human adipocyte metabolism via pyruvate carboxylase
Source: PubMed Central journal article supplement (PMC9135762; doi:10.1038/s41467-022-30620-0), 2022-05-26
Supplement: 41467_2022_30620_MOESM3_ESM.pdf [file 41467_2022_30620_MOESM3_ESM.pdf]

**The long noncoding RNA ADIPINT regulates human adipocyte metabolism via pyruvate carboxylase**

**Supplementary Files provided**

Supplementary Figures 1-7

Supplementary Methods Tables 1-3

Supplementary Data 1-15
